1 **Title**

2 Massively parallel quantification of phenotypic heterogeneity in single cell drug responses

3 **Authors**

4 Benjamin B. Yellen<sup>1,2\*</sup>, Jon S. Zawistowski<sup>2†</sup>, Eric A. Czech<sup>3‡</sup>, Caleb I. Sanford<sup>1</sup>, Elliott  
5 D. SoRelle<sup>5</sup>, Micah A. Luftig<sup>5</sup>, Zachary G. Forbes<sup>2</sup>, Kris C. Wood<sup>2,4§</sup>, Jeff  
6 Hammerbacher<sup>3‡||</sup>

7 **Affiliations**

8 <sup>1</sup> Duke University, Department of Mechanical Engineering and Materials Science, Durham,  
9 NC 27708

10 <sup>2</sup> Celldom, Inc., San Carlos, CA, 94070

11 <sup>3</sup> Medical University of South Carolina, Department of Immunology, Charleston, SC 29425

12 <sup>4</sup> Duke University, Department of Pharmacology and Cancer Biology, Durham, NC 27708

13 <sup>5</sup> Duke University, Department of Molecular Genetics and Microbiology, Center for Virology,  
14 Durham, NC 27708

15 † present address: BioSkryb, Inc., ‡ present address: Related Sciences, LLC.

16 \* [yellen@duke.edu](mailto:yellen@duke.edu), § [kris.wood@duke.edu](mailto:kris.wood@duke.edu), || [hammer@hammerlab.org](mailto:hammer@hammerlab.org)

17 **Abstract:**

18           Single cell analysis tools have made significant advances in characterizing genomic  
19 heterogeneity, however tools for measuring phenotypic heterogeneity have lagged due to the  
20 increased difficulty of handling live biology. Here, we report a single cell phenotyping tool  
21 capable of measuring image-based clonal properties at scales approaching 100,000 clones per  
22 experiment. These advances are achieved by exploiting a novel flow regime in ladder  
23 microfluidic networks that, under appropriate conditions, yield a mathematically perfect cell trap.  
24 Machine learning and computer vision tools are used to control the imaging hardware and  
25 analyze the cellular phenotypic parameters within these images. Using this platform, we  
26 quantified the responses of tens of thousands of single cell-derived acute myeloid leukemia  
27 (AML) clones to targeted therapy, identifying rare resistance and morphological phenotypes at  
28 frequencies down to 0.05%. This approach can be extended to higher-level cellular  
29 architectures such as cell pairs and organoids and on-chip live-cell fluorescence assays.

30

31

## 32 **MAIN TEXT**

### 33 **Introduction**

34 In recent years, advances in sequencing technology have enabled deep, clonally  
35 resolved views into the genomic and transcriptional heterogeneity that exists within cellular  
36 populations.[1-4] This variance is important, as it likely drives much of the phenotypic  
37 heterogeneity that underpins physiological and pathological programs.[3-5] While single cell  
38 genomic tools can now routinely measure the mutational or transcriptional profiles of >100,000  
39 individual cells in a single experiment,[6,7] similar tools for measuring single cell phenotypic  
40 heterogeneity and dynamics remain elusive owing to the complexities of working with live  
41 biology. One promising approach for capturing phenotypic heterogeneity on a massive scale  
42 entails organizing a high-density array of individual cells that can be continuously observed over  
43 time microscopically, with or without chemical or physical perturbations. Imaging these isolated  
44 clones can reveal phenotypic distributions, including rare phenotypes of biological significance,  
45 such as cells that respond uniquely to important stimuli or produce distinct secreted factors.[8,9]  
46 However, to date no existing platforms have demonstrated the ability to measure single cell  
47 phenotypes at throughputs approaching the 100,000 clone scale. The only platform that  
48 approaches this benchmark is the Berkeley Lights Beacon® instrument, but to our knowledge  
49 that platform is currently unable to perform more than four parallel experiments per instrument,  
50 limiting the ability to analyze phenotypic responses of diverse cell types to assorted stimuli.[9]

51 In cancer, rare clones that survive in the presence of chemotherapeutic treatments often  
52 drive recurrence of drug resistant disease.[10,11] In the laboratory, these clones have  
53 traditionally been isolated and studied individually through a weeks- to months-long process of  
54 selection, enrichment, and clonal isolation. As a result, it has been difficult to quantify the  
55 abundance of resistant clones in a population, directly define clonal growth properties, or scale  
56 analyses to different tumor samples, cell lines, drugs, and doses. Given the complexity and

57 heterogeneity of resistant clones within individual patients, it is expected that new, integrative  
58 approaches will be necessary to design drug therapies capable of suppressing the collective  
59 growth of resistant subclonal populations. This necessity underscores the importance of  
60 technologies that can measure these properties at scale.[10-12]

61 In this report, we present the first single cell phenotyping platform that can reach the  
62 scale of 100,000 clones in a single, multi-day, time-resolved experiment, all performed in  
63 parallel by one instrument. Our approach is made possible by fundamental advances in  
64 microfluidic chip design, improvements in methods for long-term culturing and microscopic  
65 observation of single cells, and finally advances in image processing and analysis software that  
66 allow for large image-based datasets to be automatically analyzed down to the level of individual  
67 cell morphology. Specifically, we report on a novel microfluidic design that represents the most  
68 efficient microfluidic trapping architecture to date, and we also demonstrate robust, cost-  
69 effective methods for maintaining mammalian cells on-chip over sufficient time to identify rare  
70 phenotypic properties like drug resistance. These results pave the way for more efficient  
71 methods for credentialing drugs and ultimately, improved selection of therapeutic regimens  
72 for patients. More broadly, by enabling flexible phenotypic single cell profiling at massive scale,  
73 this platform may facilitate the functional characterization of diverse and complex cellular  
74 populations.

75

## 76 **Results**

### 77 **A novel microfluidic flow regime enables high efficiency single cell trapping**

78 In our chip design, there are two unique flow regimes distinguished by the opposite  
79 directions of fluid flow that can exist in the rungs of a microfluidic ladder network, which is  
80 caused by the difference in fluidic resistances in the rails of the ladder (Fig. 1a, see  
81 supplementary theory for details). This two-state flow system is present in both microfluidic



82 mesh and ladder networks; however prior works have all used only one flow regime in cell  
83 trapping devices [13-17] in which the resistance through the trap,  $R_A$ , (one of the rails of the  
84 ladder) is higher than the hydrodynamic resistance through the bypass section,  $R_T$ , (the  
85 opposite ladder rail). In previous studies, the fluid flow in the ladder rung points away from the  
86 trap (see the blue arrows in Fig. 1a,b), which leads to a less efficient trap since cells have the  
87 ability to bypass the traps by following the streamlines towards the serpentine section.  
88 Surprisingly, there have been no prior reports of microfluidic devices in the other flow regime,  $R_A$   
89  $< R_T$ , which is vastly more efficient as a cell trap because, in this case, the flow joins rather than  
90 splits at the entrance to the trap (see the red arrows in Fig. 1a,b). This improved trapping  
91 efficiency comes at the expense of a larger device footprint, since it is necessary to design  
92 longer and narrower channels for the bypass section in order to achieve the required resistance  
93 ratio. However, this approach is advantageous when the goal is to improve the trap occupancy  
94 rate and make more efficient use of limited cell samples.

95         The working method of this trapping approach is based on a self-limiting principle, in  
96 which the fluid flow is modulated by the cell's physical presence in a trap, which functions as a  
97 switch to alternate between the two flow states. When the trap is initially empty, it is in a high  
98 efficiency flow state for capturing cells where  $R_A < R_T$ . After a trap has captured a cell, the flow  
99 profile changes because the cell's physical presence modifies the resistance through the trap,  
100 thus switching the flow state to the low efficiency capture state where  $R_A > R_T$ . The high  
101 resistance of the occupied traps causes subsequent cells to bypass the occupied traps and  
102 diverts them downstream toward unoccupied traps. As a result, the cells populate the array in a  
103 deterministic fashion with most of the traps becoming filled in the order that cells were  
104 introduced onto the chip.

105         To load the cells onto the chip, a cell suspension at a concentration of  $10^6$  cells per mL is  
106 prepared in a 0.2  $\mu\text{m}$ -filtered aliquot of cell culture media, and then a 10 – 20  $\mu\text{L}$  aliquot of cell

107 suspension is placed into the inlet reservoir, after which it takes approximately 3 to 5 minutes to  
108 fill all of the traps by applying negative pressure (20 to 50 mbar) at the microfluidic outlet. The  
109 remaining cells are then rinsed from the device by washing the inlet several times and then  
110 flowing clean filtered media through the chip for another minute, leading to a trapping  
111 distribution similar to that shown in Fig(1b, top).

112         Once the traps are filled, the cells are transferred into the apartments by applying a sub-  
113 second elevated pressure pulse, which squeezes the cells through the constrictions into the  
114 adjacent apartments. These mechanical perturbations are benign and have been successfully  
115 employed in various drug and gene delivery applications.[18-20]. As a general rule, we found  
116 that a 1:3 or 1:4 ratio for the width of the trap region compared to the diameter of the cell was  
117 ideal; this allowed cells to be consistently trapped and retained at low pressures (~20 mbar), but  
118 reliably transferred into the apartments at higher pressures (~500 mbar). In our chip designs,  
119 the single cell capture efficiency worked best when the front trap width is in the range 3 – 6  $\mu\text{m}$   
120 for cells for cell diameters in the range of 10 – 25  $\mu\text{m}$ . Representative images of the cell  
121 positions during each step of the trap and transfer process are shown in Fig. 1b.

122         We also developed automated methods for reading the individual apartment addresses  
123 from the images and quantifying the number of cells in each chamber through brightfield image  
124 classification techniques. These classifiers are based on standard image segmentation models  
125 that have been trained to detect the instances of each cell in each chamber at each time point  
126 [21,22], as described in detail in the methods section. With this software package, we were able  
127 to quantify the trapping efficiency in the array and assess any spatial biases that were used to  
128 improve the microfluidic architecture.

129         In this platform, we are simultaneously optimizing two metrics of performance, namely (1)  
130 the number of traps that end up capturing a single cell (typically ~80% in our hands), and (2) the  
131 number of cells needed to completely fill all of the traps, which is related to how the cells are

132 distributed in each of the parallel channels during the loading process. Both of these parameters  
133 need to be optimized to effectively make use of limited cell samples. Since this design is very  
134 efficient at capturing cells, the 6,016 traps in the device are consistently filled when ~10,000  
135 cells are introduced to the inlet. Due to the combination of fabrication defects, presence of  
136 debris in the cell culture media, and incompletely dissociated cell suspensions, the trap  
137 occupancy rates for MOLM-13 cells was found on average to yield ~80% single cells, ~10%  
138 empty chambers, and ~10% chambers having more than one cell (Fig. 1c).

139

#### 140 **Cell pairs and reproducible cell clusters can be organized with high efficiency**

141 This platform has the ability to organize other types of cellular architectures for myriad  
142 potential cellular analysis applications by tuning the device geometry and/or serially repeating  
143 the trap and transfer process. The ability to form heterogeneous cell pairs (Fig. 2a), for example,  
144 has potential applications in immunooncology and in forming different types of cellular micro-  
145 environments. A similar approach has been employed by others for fabricating hybridomas [13],  
146 and pairing T cells with other cells [23]. We demonstrate this pairing ability by first organizing an  
147 array of MOLM-13 cells that were labeled with CellTrace Far Red dye, and then repeating this  
148 process with the same cells that were instead loaded with CellTrace CFSE dye. In each step,  
149 we obtained ~80% single cell capture efficiency, and this yielded an overall efficiency of ~64%  
150 of chambers having heterogenous red/green single cell pairs.

151 This device can be modified to form reproducible cell groupings in a single shot by  
152 opening up the front trap, as shown in Fig. 2b. For this geometry, repeatable clusters of 6-10  
153 cells per apartment were organized reliably across the entire chip, and this approach may have  
154 potential applications for rapidly creating spheroids or organoids in a highly parallel format.

155

#### 156 **Rare cell phenotypes are observed in multi-day cell culture experiments**

157 The chips are fabricated by deep reactive ion etching (DRIE) of Silicon wafers, then  
158 anodically bonding the wafers to glass lids, followed by dicing the wafers into individual chips,  
159 and finally assembling the chips into custom-machined microfluidic chip holder (see methods  
160 section for detailed fabrication process). This fabrication approach can be readily accomplished  
161 in a standard university cleanroom and allowed us to fabricate features as small as 2  $\mu\text{m}$ . The  
162 microfluidic architecture was designed such that cells were able to squeeze through the front  
163 traps having 3 – 6  $\mu\text{m}$  constrictions; however, cells were retained by the parallel frit structure at  
164 the back of the chambers that had smaller 2  $\mu\text{m}$  constrictions. The geometry allowed fluid to  
165 pass through the apartments while retaining the cells inside the chambers over many days,  
166 enabling the study of clonal growth patterns and variability in morphological features.

167 To achieve steady perfusion of media into the chips while inside the incubator, we  
168 connect 10mL syringes to the inlet and outlet, which serve as media reservoirs. We fill the inlet  
169 syringe with media while the outlet syringe is connected to a vacuum line. In this way, we  
170 ensure that the media reservoir at the inlet has unimpeded gas exchange with the ambient  
171 conditions inside the incubator. We maintain good cell viability by using weak vacuum pressures  
172 in the range of -20 to -50 mbar to continuously flow media through the device. For this specific  
173 chip, an optimal flow rate of  $\sim 5$  mL/day is sufficient to remove metabolic waste products and  
174 provide fresh nutrients. However, the exact flow rates need to be tuned for other microfluidic  
175 geometries, cell types, and other experimental parameters.

176 The simplicity of this microfluidic design allows for re-sealable connections to be made  
177 easily between the chip and the external pressure controllers, which enables many on-chip  
178 experiments to be conducted in parallel (Fig. S1a). Each day the chip is disconnected from the  
179 pumping system to perform imaging on a standard fully automated microscope (Fig. S1b). To  
180 rapidly acquire high-resolution images of each apartment in the chip, we developed imaging  
181 algorithms that employ microscope image quality focus classifiers [24] and image-segmentation

182 computer vision models (Mask-RCNN) [25] to identify fiducial marks on the chips and determine  
183 the optimal focus for each image (see methods section and github repository posted online  
184 [26]). As a compromise between image quality and speed, we opted to perform microscopy at  
185 10X magnification, allowing the entire chip to be tiled with ~300 images where 20 apartments  
186 are captured in each field of view. This approach allows us to image each chip within 5-10  
187 minutes depending on the number of fluorescent channels, and it provided the bandwidth to  
188 image up to 18 chips per day (see Fig 1c and Fig S1).

189         With the ability to repeatedly image many chips in parallel over many days and analyze  
190 cell properties per chamber with our software pipeline, we have the statistical power to discover  
191 rare phenotypic variants of biological significance. For example, in Fig. 3a we plot the growth  
192 rate as a function of the time-averaged mean cell area across the 11,094 single cell clones that  
193 maintained positive growth rates over 96 hr. The distribution of growth rates in each of the three  
194 chips show similar phenotypic distributions, each displaying medians of ~0.95 doublings/day  
195 with the middle quartiles falling in the range of 0.84 – 1.12 doublings/day and the fastest growth  
196 rate exceeding 1.5 doublings/day. Beyond growth measurements, we found an interesting  
197 subset of clonal cellular populations that not only were fast growers but also abnormally large  
198 compared to the bulk population. A few of these rare phenotypes were found in each chip, and  
199 their frequency in the parental line was assessed to be ~0.05% for this cell line (See Fig. 3b).  
200 These rare cells consistently presented with a pear-shaped morphology (Fig. 3c), and the fact  
201 that they are larger across all timepoints and have similar morphologies provides intriguing  
202 evidence of (epi)genetically heritable cell size and shape regulation.[27]

203

### 204 ***In situ* fluorescence staining extends capabilities of high-throughput single-cell culture**

205         In addition to time-resolved studies of clonal growth rates, the microfluidic platform is  
206 readily adapted for fluorescence imaging studies, including *in situ* live cell staining. In one

207 demonstration, MOLM-13 cells were treated with a cell membrane-permeable nuclear stain  
208 (Hoescht 33258) as well as a PE-conjugated antibody against CD45, a marker expressed on all  
209 hematopoietic cells (Fig. 4a). Paired with Mask-RCNN cell instance segmentation, this  
210 experimental design can illuminate aspects of individual cell morphology and biomarker  
211 expression at high throughput on a clonal basis, including clonal phenotypic diversity. As an  
212 example, individual cell stain intensity distributions and signal statistics can be extracted for  
213 chambers of interest to study quantitative phenotypic differences within or across clones (Fig.  
214 4b,c).

215

### 216 **Rare drug resistant phenotypes are observed in multi-day cell culture experiments**

217 The power of this platform to analyze thousands of cells per chip and many chips per  
218 system makes it uniquely suited for drug screening applications that require single cell  
219 resolution. To demonstrate this approach, we conducted an 8-chip study of cells exposed to  
220 either DMSO or 0.5 nM or 1.5 nM of the FLT3 inhibitor quizartinib (AC220). MOLM-13 cells  
221 harbor the internal tandem duplication (ITD) in-frame insertion in *FLT3*, a gene mutated in ~30  
222 percent of AML patients and associated with poor prognosis.[28] ITD renders FLT3 hyperactive  
223 via ligand independent phosphorylation, thus MOLM-13 cells are exquisitely sensitive to  
224 quizartinib.[29]

225 During long-term culture, the flow through the chip needs to be fast enough so that the  
226 metabolic waste products from upstream apartments do not significantly affect the downstream  
227 apartments. The vacuum pressure required to achieve an optimal flow rate was found to be in  
228 the range of -30 to -70mbar, depending on the total number of cells in the chip. When exposed  
229 to a vacuum pressure of -50mbar, the heatmaps in Fig. 5a reveal no apparent systematic bias in  
230 cell behavior across the chip, such as differing growth rates at positions nearer to the inlet  
231 versus the outlet. This finding supports the assumption that the growth properties of the single

232 cells can be treated as statistically independent with regards to position inside the array. As  
233 expected, the cells thrived in the DMSO control, and a smaller fraction still grew well at the 0.5  
234 nM conditions; however very few cells survived the 1.5 nM conditions. In the 0.5 nM conditions,  
235 the median growth rates per chip were reduced to 0.55 doublings/day with the middle growth  
236 rate quartiles falling in the range of 0.25 – 0.79 doublings/day. Surprisingly, we still observed  
237 fast-growing cells in the drugged condition that displayed growth rates up to 1.4 doublings/day –  
238 these rare cells appear to be practically unaffected by the drug treatment (Fig. 5b). One striking  
239 example of a drug resistant cell growing in the background of drug sensitive cells is shown in  
240 Fig. 5c after several days of exposure to 0.75 nM quizartinib (see Movie S1 and Fig. 5c).

241 We also observed a consistent, positive correlation between cell area and growth rates  
242 across the different drug conditions, likely reflecting FLT-3 ITD's established control over cell  
243 size and proliferation regulators like the mTOR and ERK pathways, respectively.[28] For  
244 example, the time-averaged median area per cell that was measured in the DMSO conditions  
245 was found to be  $137 \mu\text{m}^2$  with the middle quartiles ranging from  $128 - 144 \mu\text{m}^2$ , whereas at 0.5  
246 nM quizartinib the mean cell areas were reduced to a median of  $126 \mu\text{m}^2$  and with the middle  
247 quartiles ranging from  $119 - 133 \mu\text{m}^2$ . However, we did not observe similar trends in the  
248 relationship between cell shape (eccentricity vs growth rate) as shown in Fig. S2. These  
249 relationships are further exemplified in Fig. S3, which shows a parallel coordinates plot linking  
250 the individual cell trajectories to the size dependence. The similarity of the growth trajectories  
251 across different cohorts was also classified with t-SNE plots in Fig. S4.

252

## 253 Discussion

254 We have developed a high throughput live cell biology platform that can establish and  
255 maintain highly reproducible cellular architectures on chip for multiple days. This platform  
256 enables the analysis of phenotypic heterogeneity at the necessary scales for measuring low



257 frequency variants in a population, such as cells that are resistant to a drug or have other rare  
258 morphological features. There are potential areas for improving this platform, such as by  
259 functionalizing the substrates with adhesive vs. non-adhesive patches at selective positions in  
260 the device and by using frit structures based on porous hydrogels,[30] which can help support  
261 and better constrain adherent and suspension cell cultures. We also expect that in the future  
262 these high-throughput phenotyping capabilities can be combined with the selective patterning of  
263 DNA primers inside the apartments to enable highly parallel transcriptome measurements to be  
264 perform in parallel with the image-based phenotyping for potential applications in single cell  
265 functional pharmacogenomics assays.

266

## 267 **Materials and Methods**

### 268 **Experimental Design**

269 **Chip Fabrication:** Microfluidic chips are fabricated on 6” wafers using deep reactive ion etching  
270 (DRIE) to form the channel walls, as previously described [31,32]. Photoresist (Shipley 1813) is  
271 spun onto the wafers at 500rpm for 5s and 4000 rpm for 60 s, baked at 115 °C for 60 s, exposed  
272 to 80-100 mJ/cm<sup>2</sup> in a Karl Suss MA6 mask aligner, and then developed in Microposit MF319  
273 developer for 30 s. The wafers are then thoroughly cleaned and etched to a depth of 15 – 20 µm  
274 in the DRIE (SPTS Pegasus Deep Silicon Etcher). The photoresist mask is then stripped and  
275 cleaned in piranha solution (3:1 H<sub>2</sub>SO<sub>4</sub> to H<sub>2</sub>O<sub>2</sub> at 200°C). Next, a 15µm thick layer of AZ 9260  
276 photoresist is spun onto the backside of the wafer at 500 rpm for 5s and 1800rpm for 60s, baked  
277 at 110 °C for 60s, exposed to 4000 mJ/cm<sup>2</sup> and developed for 300s in AZ400K 1:4 developer.  
278 This layer is used to create through silicon vias to establish the inlets and outlets and dice the  
279 chips. The photoresist is then stripped and thoroughly cleaned as described previously. Finally,  
280 we anodically bond borosilicate glass to the Silicon microchannels at 300 °C for 3 hr. In total,  
281 each wafer yields 12 devices (chips), which have dimensions of 30 mm X 25 mm.



282

283 **Microfluidic Setup:** Custom-made chip holders were machined in Aluminum (Protolabs, MN),  
284 comprising a bottom holder and a top-viewing window. The bottom piece contained ¼"-28  
285 threaded holes to allow for connection to be made to the chips with screw-in luer locks (part  
286 number, company, city). The chip holders were also anodized (Surtronics, Raleigh, NC) to  
287 ensure that they would last inside the high humidity environment of a cell culture incubator for  
288 long durations. The chip holders were placed onto a custom stage adapter and mounted on a  
289 ASI-RAMM microscope (Applied Scientific Instrumentation, Eugene, OR), that contains an  
290 automated focus drive, objective changer, and filter changer. Fluid was introduced to the chip  
291 with an Elvesys pressure controller (OB1 MK3+, Paris, France) that applied vacuum pressure at  
292 the outlet.

293

294 **Cell Culture:** MOLM-13 acute myeloid leukemia cells [33] were obtained from the Wood lab.  
295 Cells were maintained in RPMI 1640 medium (Gibco 11875-093) supplemented with 10% fetal  
296 bovine serum (Gibco 10347-028) and penicillin/streptomycin (Gibco 15140-122) in a 5% CO<sub>2</sub>  
297 environment. Cells were passaged in T25 flasks and centrifuged for 5 min at 350 rcf prior to  
298 sub-culturing to maintain a density range of 2.0 – 3.0 x 10<sup>6</sup> cells per mL. A new thaw of cells  
299 was utilized every 8 weeks to minimize genetic drift. Counting and viability determination with  
300 0.4% Trypan Blue with a Countess II instrument (ThermoFisher Scientific). Quizartinib (AC220)  
301 was obtained from Selleck Chemicals LLC.

302

303 **Cell Loading:** Cells were loaded into the chip by pipetting a 20mL aliquot into screw-in luer  
304 locks positioned on the inlet side, after which the cells were infused into the chip by applying 20  
305 – 30 mbar vacuum pressure to the outlet side using a syringe body that was attached to a  
306 rubber stopper. The microfluidic architecture consists of one inlet and one outlet, which feed into

307 the active area of the chip by successive flow division in a binary tree, leading to 128 parallel  
308 streets with 47 apartments in series. The loading time typically required 3 – 5 minutes for the  
309 cells to reach the last row of apartments in each street, corresponding to a loading rate of about  
310 20 cells per second. After the cells were trapped in each constriction, the luer locks on the inlet  
311 side were rinsed at least 3 times by replacing the fluid with fresh cell culture media. In order to  
312 eliminate any remaining cells that were stuck in the luer lock or on the chip surface, we  
313 irradiated the luer locks with UVC using a 270nm LED diode attached to a heat sink (Irtronix,  
314 Torrance, CA) – this provided a lethal radiation dose to any non-specifically adhered cells and  
315 prevented the chips from being invaded with cells at later time points. Finally, the cells were  
316 squeezed through the constrictions by applying a brief (~1s) pressure pulse in the range of 300  
317 – 800mbar to the outlet. The chips were then disconnected from the imager and put into the  
318 incubator.

319

320 **High-Throughput Microscopy:** We developed custom python codes to rapidly take images of  
321 each chamber. The algorithm involved first identifying 3 crosshairs on the chip to establish the  
322 equation of a plane, next creating a stage position list containing the XY position and optimal  
323 focal plane for each image, then taking images of each chamber, and finally saving and naming  
324 the images in custom formats to render them compatible with the computer vision algorithms.  
325 The software used to image the chips is provided at github,[26] and since they are based on a  
326 python wrapper for Micro-Manager [34], the program is easily adapted for most standard robotic  
327 microscopes.

328

329 **Fluorescence Imaging:** Chips were loaded with MOLM-13 cells and cultured in 0.2  $\mu\text{m}$ -filtered  
330 R10 media at 37°C and 5% CO<sub>2</sub>. At 72 hr, 5  $\mu\text{L}$  of Hoescht 33258 (0.1 mg/mL) was added to  
331 ~50  $\mu\text{L}$  of media at the microfluidic inlet port and flowed onto the chip using negative pressure (-

332 100 mbar) applied at the microfluidic outlet. Constant flow was maintained for 10-15 minutes to  
333 stain cell nuclei, followed by rinsing with media. Similarly, 5  $\mu$ L of PE-conjugated anti-CD45  
334 (Invitrogen, 0.2 mg/mL) was flowed in, incubated, and rinsed prior to imaging. Multichannel  
335 images were collected in brightfield and using standard DAPI and Texas Red filter sets.

336

## 337 **Statistical Analysis**

338 **Image Analysis:** We developed custom python codes to rapidly analyze the images and extract  
339 cellular phenotypic properties in a computationally efficient manner. Our cell extraction  
340 algorithms make use of the Mask-RCNN image segmentation model, [35] which is designed to  
341 identify objects in images without the need for pixel classification post-processing. This is an  
342 advance on previous methods for biological image segmentation [36,37] that enabled us to  
343 compose a simple pipeline for cell quantification using a minimal amount of training data. In a  
344 separate study, we quantified the superior performance of Mask-RCNN segmentation relative to  
345 supervised segmentation algorithms and statistical methods.[38] Similarly, the SVHN (street  
346 view housing number)[39] model is an architecture for digit classification that we used to  
347 determine the apartment identifiers etched into the chips.

348 Our pipeline consists of three separately applied models where the first is used to identify  
349 a key point within each apartment image (hereto referred to as a “marker”), given an image  
350 containing multiple apartments (i.e. raw microscope images). Images of individual apartments  
351 were then extracted using these markers. Because the raw microscope images often have slight  
352 rotations, the relative positions of the identified markers in adjacent apartments were used to  
353 infer an overall rotation of the images to be inverted before further decomposing the individual  
354 apartment images. The apartment images were then registered against a template image to  
355 remove small translations. The digit identifiers for each apartment, with no rotations or  
356 translations, were extracted based on fixed offsets from the marker position. Fixed offsets are

357 determined relative to several chip landmarks and need to be updated whenever the chip form  
358 factor is altered. Identification of individual cell objects is performed based on the entire  
359 apartment image, but segmented results are filtered to the chamber and trap areas, again using  
360 fixed offsets from the marker, as a way to prohibit erroneous classification of debris within  
361 microfluidic channels.

362 Training for the cell segmentation model included 814 annotated images and the Mask-  
363 RCNN model trained was initialized to a weight set resulting from pre-training over the COCO  
364 [40] image dataset, a feature provided by the Matterport implementation.[25] Training also  
365 included an augmentation pipeline consisting of image flips, affine rotations, random croppings,  
366 contrast transform, and blurring. The marker identification model was trained in a very similar  
367 fashion but required only 70 annotated images since the associated classification task was  
368 simpler. By contrast, the digit recognition model required far more training data (9,375 annotated  
369 images) though this annotation task was much less time consuming since the individual digit  
370 images only needed to be assigned a class, as such bounding boxes or object masks were not  
371 required.

372 We have also developed a dashboard visualization tool that allows the growth rates and  
373 other properties to be viewed at the experiment level, individual apartment level, and array  
374 levels. More details on the software package can be found at github.[22]

375

376 **Data Analysis:** The data presented in Figures 3 & 5 is limited to chambers starting from a  
377 single cell and having at least one cell in the apartment at each time point. This led to  
378 significantly fewer data points for the 1.5 nM quizartinib cohort, where a majority of cells did not  
379 survive the drug treatment over several days. The growth rates are determined by fitting the raw  
380 trajectories to an exponential with base 2. The calculated growth rates are likely to be a lower

381 bound, since the image-segmentation models begin to miss cells in apartments that are very  
382 crowded, as shown in Fig. 3b.

383

## 384 **H2: Supplementary Materials**

385 Supplementary Theory

386 Fig. S1. Experimental setup

387 Fig. S2. Scatterplot of growth rate versus cell size or shape

388 Fig. S3. Parallel coordinates plot of growth trajectories and mean cell areas

389 Fig. S4. t-SNE plot of growth trajectories

390 Movie S1. Drug resistant AML clone growing in 0.75 nM quizartinib

391

## 392 **References**

- 393 1. Kim C, Gao R, Sei E, Brandt R, Hartman J, Hatschek T, Crosetto N, Foukakis T, Navin NE  
394 (2018) Chemoresistance Evolution in Triple-Negative Breast Cancer Delineated by Single-Cell  
395 Sequencing. *Cell* **173**: 879-893.e813.
- 396 2. Evrony Gilad D, Lee E, Mehta Bhaven K, Benjamini Y, Johnson Robert M, Cai X, Yang L,  
397 Haseley P, Lehmann Hillel S, Park Peter J, Walsh Christopher A (2015) Cell Lineage Analysis in  
398 Human Brain Using Endogenous Retroelements. *Neuron* **85**: 49-59.
- 399 3. Tanay A, Regev A (2017) Scaling single-cell genomics from phenomenology to mechanism.  
400 *Nature* **541**: 331-338.
- 401 4. Regev A, Teichmann SA, Lander ES, Amit I, Benoist C, Birney E, Bodenmiller B, Campbell P,  
402 Carninci P, Clatworthy M, Clevers H, Deplancke B, Dunham I, Eberwine J, Eils R, Enard W,  
403 Farmer A, Fugger L, Göttgens B, Hacohen N, Haniffa M, Hemberg M, Kim S, Klenerman P,  
404 Kriegstein A, Lein E, Linnarsson S, Lundberg E, Lundberg J, Majumder P, Marioni JC, Merad  
405 M, Mhlanga M, Nawijn M, Netea M, Nolan G, Pe'er D, Phillipakis A, Ponting CP, Quake S, Reik

- 406 W, Rozenblatt-Rosen O, Sanes J, Satija R, Schumacher TN, Shalek A, Shapiro E, Sharma P,  
407 Shin JW, Stegle O, Stratton M, Stubbington MJT, Theis FJ, Uhlen M, van Oudenaarden A,  
408 Wagner A, Watt F, Weissman J, Wold B, Xavier R, Yosef N, Human Cell Atlas Meeting P (2017)  
409 The Human Cell Atlas. *eLife* **6**: e27041.
- 410 5. Petti AA, Williams SR, Miller CA, Fiddes IT, Srivatsan SN, Chen DY, Fronick CC, Fulton RS,  
411 Church DM, Ley TJ (2019) A general approach for detecting expressed mutations in AML cells  
412 using single cell RNA-sequencing. *Nature Communications* **10**: 3660.
- 413 6. Zheng GXY, Terry JM, Belgrader P, Ryvkin P, Bent ZW, Wilson R, Ziraldo SB, Wheeler TD,  
414 McDermott GP, Zhu J, Gregory MT, Shuga J, Montesclaros L, Underwood JG, Masquelier DA,  
415 Nishimura SY, Schnall-Levin M, Wyatt PW, Hindson CM, Bharadwaj R, Wong A, Ness KD,  
416 Beppu LW, Deeg HJ, McFarland C, Loeb KR, Valente WJ, Ericson NG, Stevens EA, Radich JP,  
417 Mikkelsen TS, Hindson BJ, Bielas JH (2017) Massively parallel digital transcriptional profiling of  
418 single cells. **8**: 14049.
- 419 7. Stuart T, Satija R (2019) Integrative single-cell analysis. *Nature Reviews Genetics* **20**: 257-  
420 272.
- 421 8. Beaumont KG, Hamou W, Bozinovic N, Silvers TR, Shah H, Dave A, Allette K, Strahl M,  
422 Wang Y-c, Arib H, Antoine A, Ellis E, Smith M, Bruhn B, Dottino P, Martignetti JA, Schadt E,  
423 White M, Sebra R (2018) Multiparameter cell characterization using nanofluidic technology  
424 facilitates real-time phenotypic and genotypic elucidation of intratumor heterogeneity. *bioRxiv*:  
425 457010.
- 426 9. Mocchiari A, Roth TL, Bennett HM, Soumillon M, Shah A, Hiatt J, Chapman K, Marson A,  
427 Lavieu G (2018) Light-activated cell identification and sorting (LACIS) for selection of edited  
428 clones on a nanofluidic device. *Communications Biology* **1**: 41.
- 429 10. Amirouchene-Angelozzi N, Swanton C, Bardelli A (2017) Tumor Evolution as a Therapeutic  
430 Target. *Cancer Discovery*.

- 431 11. Chatterjee N, Bivona TG (2019) Polytherapy and Targeted Cancer Drug Resistance. *Trends*  
432 *in Cancer* **5**: 170-182.
- 433 12. McCoach CE, Bivona TG (2019) Engineering Multidimensional Evolutionary Forces to  
434 Combat Cancer. *Cancer Discovery* **9**: 587.
- 435 13. Skelley AM, Kirak O, Suh HY, Jaenisch R, Voldman J (2009) Microfluidic control of cell  
436 pairing and fusion. *Nature Methods* **6**: 147-152.
- 437 14. Di Carlo D, Wu LY, Lee LP (2006) Dynamic single cell culture array. *Lab on a Chip* **6**: 1445-  
438 1449.
- 439 15. Jin D, Deng B, Li JX, Cai W, Tu L, Chen J, Wu Q, Wang WH (2015) A microfluidic device  
440 enabling high-efficiency single cell trapping. *Biomicrofluidics* **9**: 014101.
- 441 16. Crane MM, Clark IBN, Bakker E, Smith S, Swain PS (2014) A Microfluidic System for  
442 Studying Ageing and Dynamic Single-Cell Responses in Budding Yeast. *PLOS ONE* **9**:  
443 e100042.
- 444 17. Dura B, Dougan SK, Barisa M, Hoehl MM, Lo CT, Ploegh HL, Voldman J (2015) Profiling  
445 lymphocyte interactions at the single-cell level by microfluidic cell pairing. *Nature*  
446 *Communications* **6**: 5940.
- 447 18. Islam M, Brink H, Blanche S, DiPrete C, Bongiorno T, Stone N, Liu A, Philip A, Wang G,  
448 Lam W, Alexeev A, Waller EK, Sulchek T (2017) Microfluidic Sorting of Cells by Viability Based  
449 on Differences in Cell Stiffness. *Scientific Reports* **7**: 1997.
- 450 19. DiTommaso T, Cole JM, Cassereau L, Buggé JA, Hanson JLS, Bridgen DT, Stokes BD,  
451 Loughhead SM, Beutel BA, Gilbert JB, Nussbaum K, Sorrentino A, Toggweiler J, Schmidt T,  
452 Gyuelveszi G, Bernstein H, Sharei A (2018) Cell engineering with microfluidic squeezing  
453 preserves functionality of primary immune cells in vivo. *Proceedings of the National Academy of*  
454 *Sciences* **115**: E10907.



- 455 20. Sharei A, Zoldan J, Adamo A, Sim WY, Cho N, Jackson E, Mao S, Schneider S, Han M-J,  
456 Lytton-Jean A, Basto PA, Jhunjhunwala S, Lee J, Heller DA, Kang JW, Hartoularos GC, Kim K-  
457 S, Anderson DG, Langer R, Jensen KF (2013) A vector-free microfluidic platform for intracellular  
458 delivery. *Proceedings of the National Academy of Sciences* **110**: 2082.
- 459 21. Caicedo JC, Goodman A, Karhohs KW, Cimini BA, Ackerman J, Haghghi M, Heng C,  
460 Becker T, Doan M, McQuin C, Rohban M, Singh S, Carpenter AE (2019) Nucleus segmentation  
461 across imaging experiments: the 2018 Data Science Bowl. *Nature Methods* **16**: 1247-1253.
- 462 22. Czech EA (2020) hammerlab/SmartCount: v1.0.0. doi: 105281/zenodo4304993.
- 463 23. Li Y, Jang JH, Wang C, He B, Zhang K, Zhang P, Vu T, Qin L (2017) Microfluidics Cell  
464 Loading-Dock System: Ordered Cellular Array for Dynamic Lymphocyte-Communication Study.  
465 *Advanced Biosystems* **1**: 1700085.
- 466 24. Yang SJ, Berndl M, Michael Ando D, Barch M, Narayanaswamy A, Christiansen E, Hoyer S,  
467 Roat C, Hung J, Rueden CT, Shankar A, Finkbeiner S, Nelson P (2018) Assessing microscope  
468 image focus quality with deep learning. *BMC Bioinformatics* **19**: 77.
- 469 25. Abdulla W (2017) Mask R-CNN for object detection and instance segmentation on Keras  
470 and TensorFlow. *GitHub repository*: [https://github.com/matterport/Mask\\_RCNN](https://github.com/matterport/Mask_RCNN).
- 471 26. Sanford CI, Yellen BB (2020) yellenlab/SmartScope: v1.0. doi:105281/zenodo4319319.
- 472 27. Lloyd Alison C (2013) The Regulation of Cell Size. *Cell* **154**: 1194-1205.
- 473 28. Daver N, Schlenk RF, Russell NH, Levis MJ (2019) Targeting FLT3 mutations in AML:  
474 review of current knowledge and evidence. *Leukemia* **33**: 299-312.
- 475 29. Zarrinkar PP, Gunawardane RN, Cramer MD, Gardner MF, Brigham D, Belli B, Karaman  
476 MW, Pratz KW, Pallares G, Chao Q, Sprankle KG, Patel HK, Levis M, Armstrong RC, James J,  
477 Bhagwat SS (2009) AC220 is a uniquely potent and selective inhibitor of FLT3 for the treatment  
478 of acute myeloid leukemia (AML). *Blood* **114**: 2984-2992.



- 479 30. Decock J, Schlenk M, Salmon J-B (2018) In situ photo-patterning of pressure-resistant  
480 hydrogel membranes with controlled permeabilities in PEGDA microfluidic channels. *Lab on a*  
481 *Chip* **18**: 1075-1083.
- 482 31. Ohiri KA, Kelly ST, Motschman JD, Lin KH, Wood KC, Yellen BB (2018) An acoustofluidic  
483 trap and transfer approach for organizing a high density single cell array. *Lab on a Chip* **18**:  
484 2124-2133.
- 485 32. Li Y, Motschman JD, Kelly ST, Yellen BB (2020) Injection Molded Microfluidics for  
486 Establishing High-Density Single Cell Arrays in an Open Hydrogel Format. *Analytical Chemistry*  
487 **92**: 2794-2801.
- 488 33. Matsuo Y, MacLeod RAF, Uphoff CC, Drexler HG, Nishizaki C, Katayama Y, Kimura G, Fujii  
489 N, Omoto E, Harada M, Orita K (1997) Two acute monocytic leukemia (AML-M5a) cell lines  
490 (MOLM-13 and MOLM-14) with interclonal phenotypic heterogeneity showing MLL-AF9 fusion  
491 resulting from an occult chromosome insertion, ins(11;9)(q23;p22p23). *Leukemia* **11**: 1469-  
492 1477.
- 493 34. Edelstein A, Amodaj N, Hoover K, Vale R, Stuurman N (2010) Computer Control of  
494 Microscopes Using  $\mu$ Manager. *Current Protocols in Molecular Biology* **92**: 14.20.11-14.20.17.
- 495 35. He K, Gkioxari G, Dollar P, Girshick R (2017) Mask R-CNN. The IEEE International  
496 Conference on Computer Vision (ICCV). pp. 2961-2969.
- 497 36. Ronneberger O, Fischer P, Brox T (2015) U-Net: Convolutional Networks for Biomedical  
498 Image Segmentation. *arXiv:150504597*.
- 499 37. Berg S, Kutra D, Kroeger T, Straehle CN, Kausler BX, Haubold C, Schiegg M, Ales J, Beier  
500 T, Rudy M, Eren K, Cervantes JI, Xu B, Beuttenmueller F, Wolny A, Zhang C, Koethe U,  
501 Hamprecht FA, Kreshuk A (2019) ilastik: interactive machine learning for (bio)image analysis.  
502 *Nature Methods* **16**: 1226-1232.

503 38. SoRelle ED WS, Yellen BB, Wood KC, Luftig MA, Chan C (2020) Comparing Instance  
504 Segmentation Methods for Analyzing Clonal Growth of Single Cells in Microfluidic Chips.  
505 *bioRxiv: TBD*.

506 39. Goodfellow IJ, Bulatov Y, Ibarz J, Arnoud S, Shet V (2013) Multi-digit Number Recognition  
507 from Street View Imagery using Deep Convolutional Neural Networks. *arXiv:13126082*.

508 40. Lin T-Y, Maire M, Belongie S, Bourdev L, Girshick R, Hays J, Perona P, Ramanan D, Zitnick  
509 CL, Dollar P (2014) Microsoft COCO: Common Objects in Context. *arXiv:14050312*

510

## 511 **Acknowledgments**

512 **General:** The authors are thankful to prior members of the Yellen lab who contributed to early  
513 experiments and testing of microfluidic designs.

514 **Funding:** The authors acknowledge support from NIH grants R43GM122149, R44GM122149,  
515 R21GM131279, and R21CA220082.

516 **Author contributions:** B.B.Y. designed and fabricated the chips, built the imaging and pumping  
517 systems, wrote early versions of the automated imaging codes, trained the cell classifier, and  
518 analyzed the datasets. J.S.Z. performed and analyzed the drug resistance experiments. E.A.C.  
519 wrote the data visualization software package, trained the digit and marker classifiers, and  
520 maintains the software on a github repository. C.I.S. wrote the fully automated imaging codes  
521 and maintains the software on a github repository. E.D.S. conducted the biological experiments  
522 with *in situ* fluorescent imaging. Z.G.F., M.A.L., K.C.W., and J.H. supervised the experiments  
523 and data analysis methods. All authors provided comments to the manuscript. All authors have  
524 seen and approved the manuscript, which has not been accepted or published elsewhere.

525 **Competing interests:** B.B.Y., Z.G.F and K.C.W. are co-founders and shareholders of Celldom,  
526 J.S.Z. is a former employee and is a current shareholder of Celldom. Duke University has filed  
527 patent applications on this microfluidic trapping approach, which are licensed to Celldom.

528 **Data and materials availability:** All data needed to evaluate the conclusions in the paper are  
529 present in the paper and/or the Supplementary Materials.

530 **Figures and Tables**

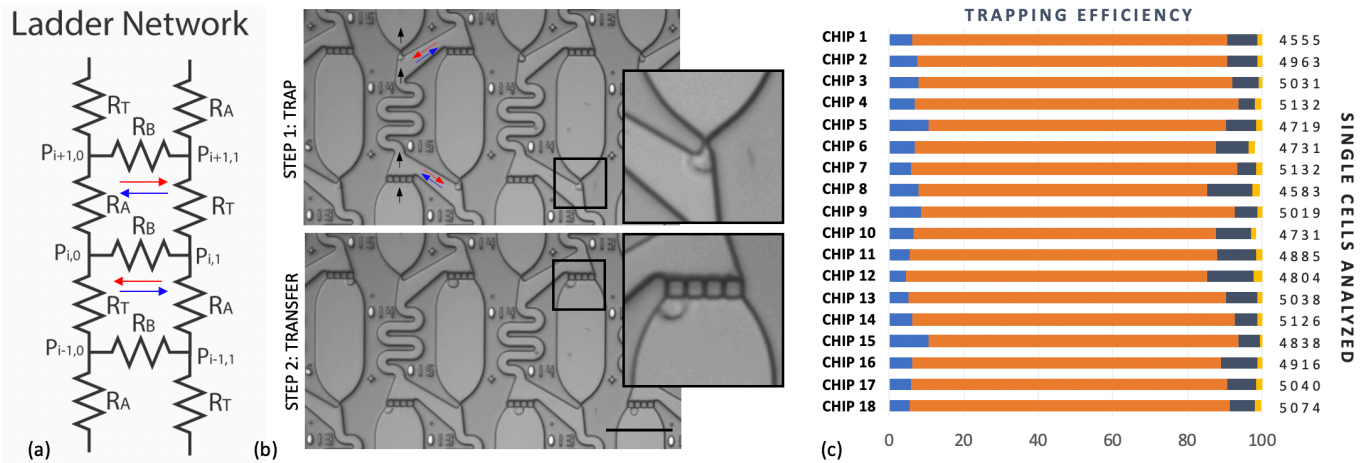

531

532 **Figure 1. Working Principle.** The microfluidic device can be modeled as a ladder resistor  
 533 network (a), which has two flow regimes that have high (or low) cell trapping efficiency. The high  
 534 (low) trapping flow regimes are depicted by the red (blue) arrows, respectively, in which the fluid  
 535 joins (splits) before entering the apartment. The cells are first trapped in the constriction (b, top),  
 536 and then transferred into the apartments with a brief pressure pulse (b, bottom). A higher  
 537 magnification view of each step in the trap and transfer process is shown. The results from one  
 538 experiment consisting of 18-chips (c) capturing a total of 88,317 cells shows that on average  
 539 83% of apartments contain a single cell (orange bars), 7% are empty (light blue bars), and 10%  
 540 have more than one cell (dark blue bars [2 cells] and gold bars [> 2 cells]). Scale bar is 100- $\mu$ m.

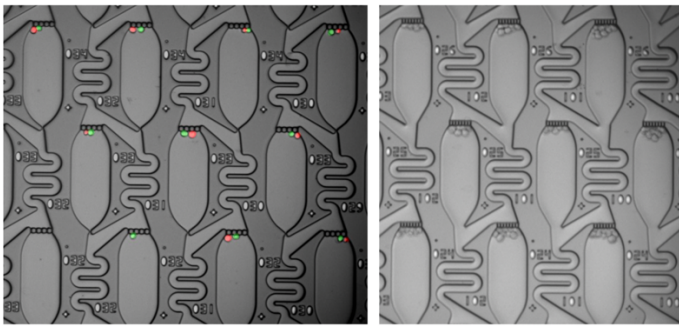

541

(a)

(b)

542

**Figure 2. Multi-cellular architectures.** (a) Heterogeneous single cell pairs are formed by

543

repeating the trap and transfer process with different cell types, whereas (b) highly reproducible

544

cell clusters are created in a single shot when the front trap is opened up.

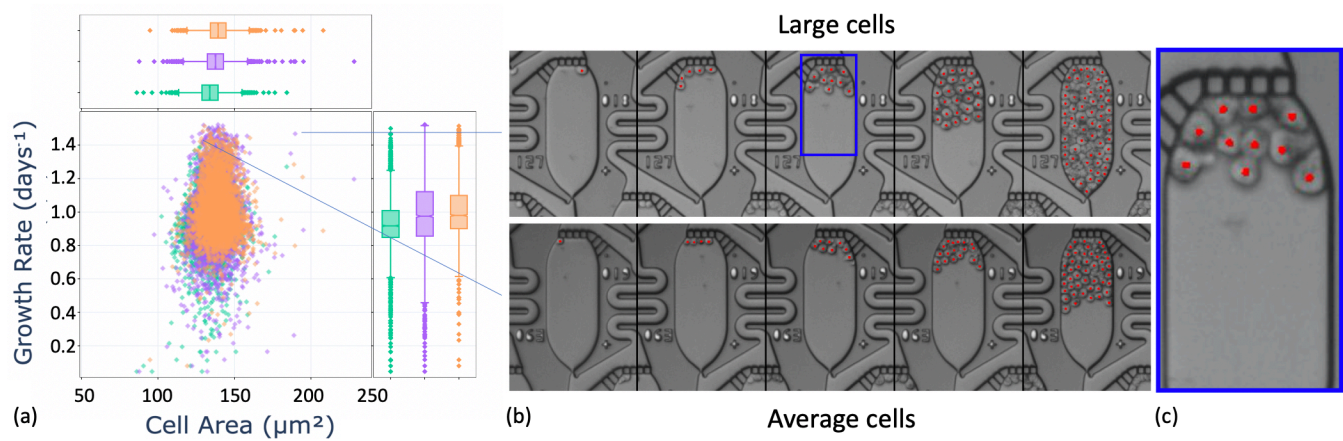

545

546

547

548

549

550

551

552

553

554

555

**Figure 3. Phenotypic heterogeneity measured in extended duration culture.** MOLM-13

cells were grown for 96 hr under continuous perfusion with RPMI media with 10% FBS. The growth rate distribution vs. time-averaged cell area across three chips (a), with example views of the average cell morphology compared to a rare subset of significantly larger cells (b), which were present at frequencies of approximately 0.05%. The time lapse images are taken at 24 hr intervals, and red dots are added to the images to depict the locations of the cell centroids as identified by the image analysis software. A higher magnification view of the cells with pear-shaped morphology is also shown (c).



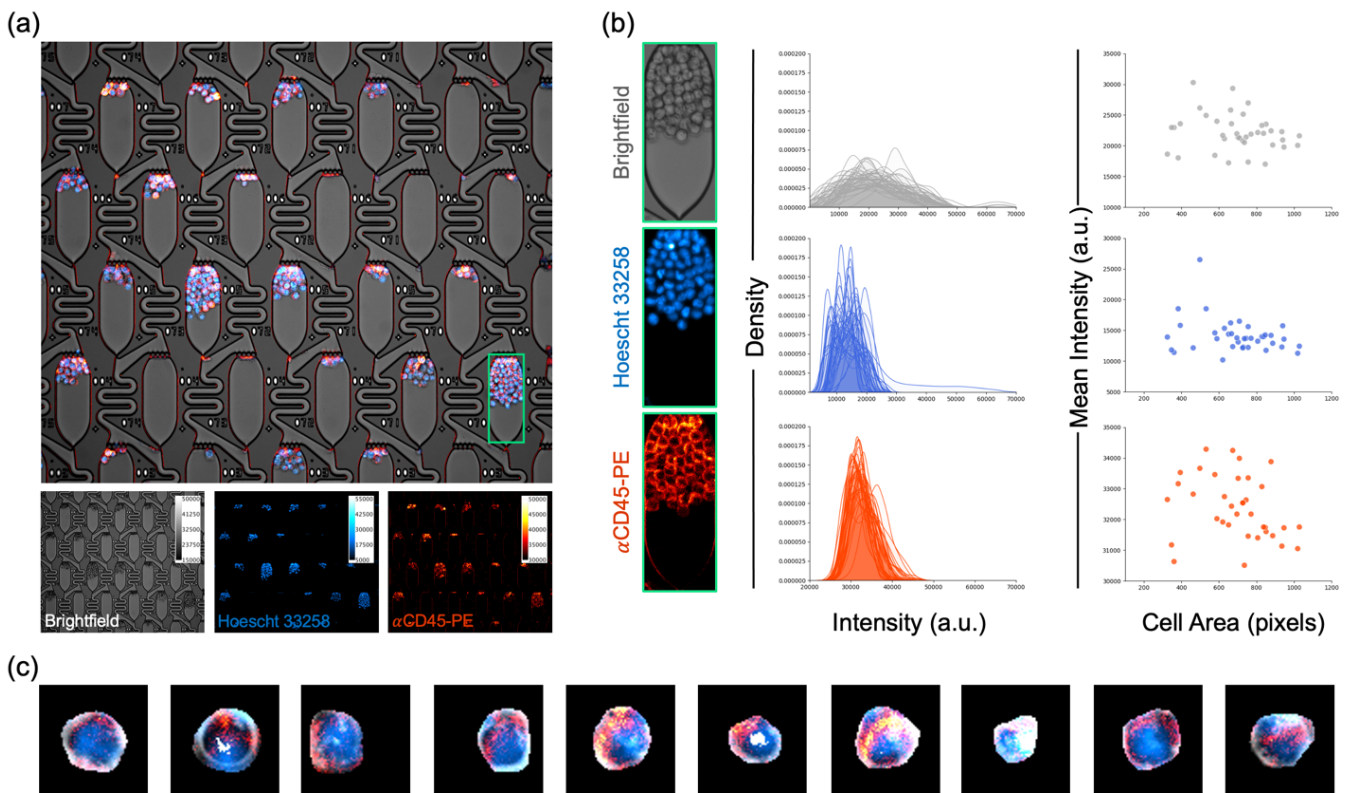

556

557 **Figure 4. High-throughput extraction of clonal fluorescence data.** (a) Multi-channel live-cell  
558 imaging of MOLM-13 clonal populations. After 72 hr of culture under constant flow, cells were  
559 stained *in situ* with Hoescht 33258 to visualize nuclei and PE-conjugated antibody against  
560 CD45, a pan-hematopoietic cell surface marker. (b) Signal quantification of MOLM-13 cells  
561 within a single culture chamber. Density plots depict brightfield, nuclear, and surface marker  
562 stain intensity distributions of automatically segmented individual cells within the selected  
563 chamber. Scatter plots present the relationship between cell size and mean intensity in each  
564 imaging channel. (c) Example multichannel images demonstrating diversity of individual cells  
565 segmented using Mask-RCNN.

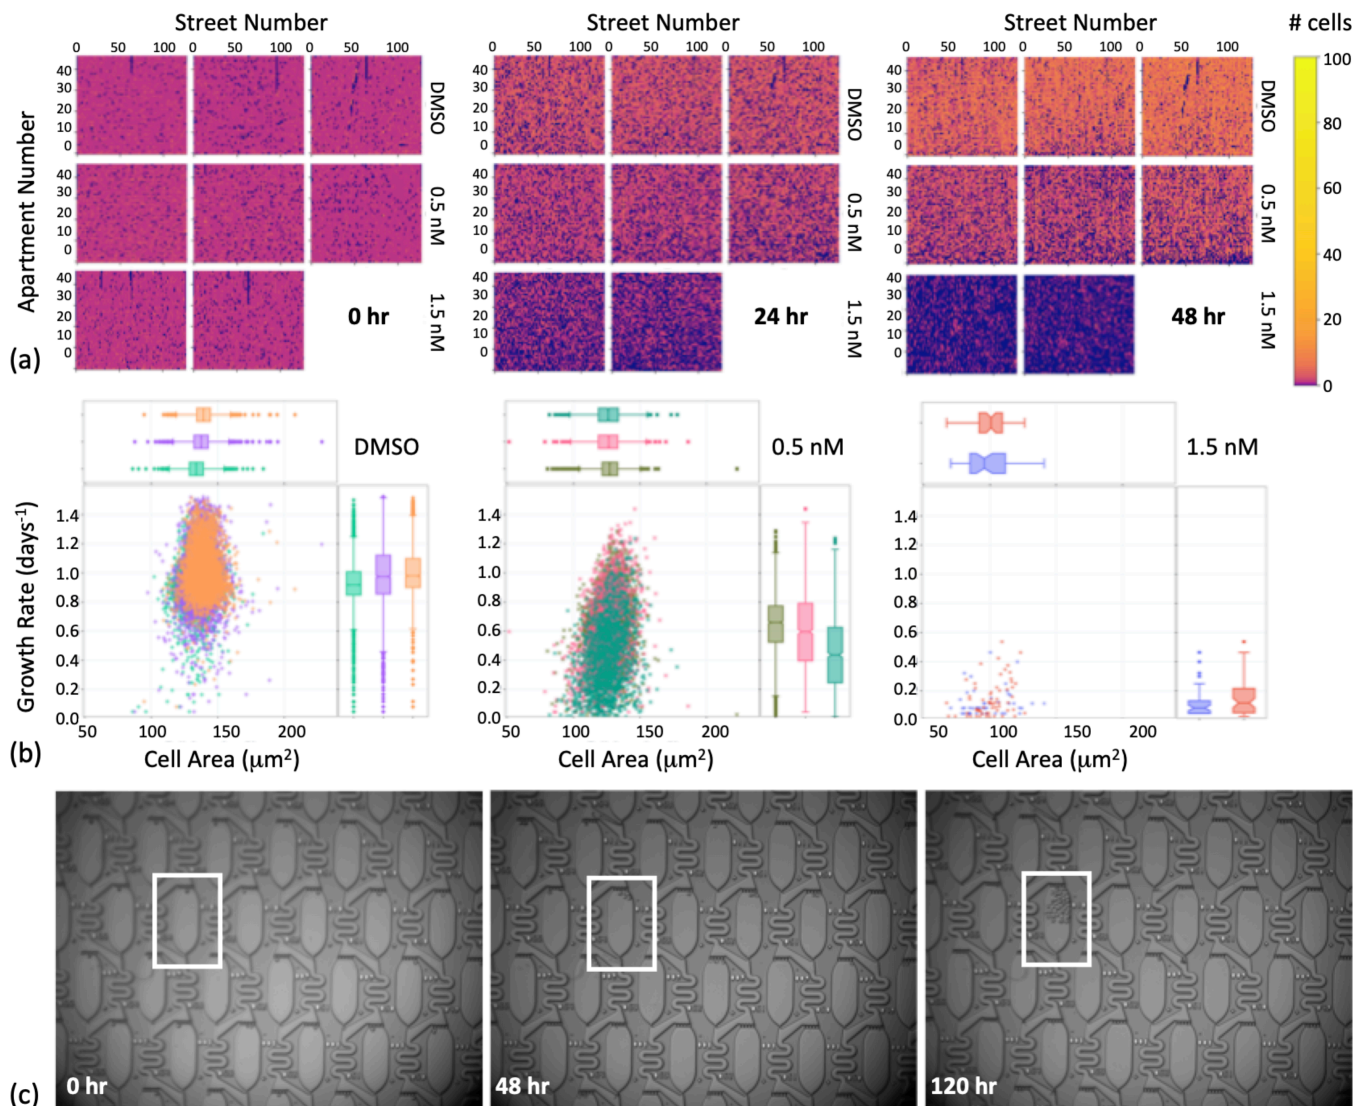

566

567

568

569

570

571

572

573

574

575

**Figure 5. Growth rate heterogeneity due to drug response.** The growth rates of MOLM-13 cells were measured in DMSO or 0.5 nM or 1.5 nM quizartinib over 96 hr. (a) To visualize the distribution of growth rates at different locations in the chip, the cell number per apartment is plotted a heatmap at  $t = 0$ ,  $t = 24$ , and  $t = 48$  hr. The heatmap colors are plotted on a log scale to better visualize the apartments with 0 or 1 cells. (b) The growth rates are shown in several scatter plots for the three cohorts depicting the relationship between doubling rate and mean cell area in each clone. (c) A time lapse of a single drug resistant clone emerging over 120 hr in 0.75 nM quizartinib is highlighted.



## 576 **Supplementary Theory**

577 Laminar flow hydrodynamic networks can be modeled like electrical circuits, where the  
 578 pressure, flow rate, and hydrodynamic resistances are analogous to voltage, current, and  
 579 electrical resistances. Ladder (or mesh) networks are comprised of two types of resistors,  
 580 including those aligned parallel to the main flow path, i.e.,  $R_A$  and  $R_T$ , (the rails of the ladder)  
 581 and those aligned perpendicular to the main flow path, i.e.,  $R_B$  (the rungs of the ladder). The  
 582 flow distribution can be solved by setting up continuity equations at each branch point in the  
 583 array. From there, we apply a constant pressure drop,  $\Delta P$ , parallel to the flow direction across  
 584 each array period. This system of equations thus reduces to solving the pressure at 4 nodes in  
 585 the minimum unit cell, which are given by:

$$586 \begin{bmatrix} R_B^{-1} + R_A^{-1} + R_T^{-1} & -R_B^{-1} & -R_A^{-1} - R_T^{-1} & 0 \\ -R_B^{-1} & R_B^{-1} + R_A^{-1} + R_T^{-1} & 0 & -R_A^{-1} - R_T^{-1} \\ -R_A^{-1} - R_T^{-1} & 0 & R_B^{-1} + R_A^{-1} + R_T^{-1} & -R_B^{-1} \\ 0 & -R_A^{-1} - R_T^{-1} & -R_B^{-1} & R_B^{-1} + R_A^{-1} + R_T^{-1} \end{bmatrix} \begin{bmatrix} P_{i,0} \\ P_{i+1,0} \\ P_{i,1} \\ P_{i+1,1} \end{bmatrix} = \Delta P \begin{bmatrix} R_A^{-1} \\ R_T^{-1} \\ -R_A^{-1} \\ -R_T^{-1} \end{bmatrix}$$

587 where  $P_{i,0}$ ,  $P_{i,1}$ ,  $P_{i+1,0}$ , and  $P_{i+1,1}$  are the four unique nodes of the unit lattice.

588 The pressures at each node can be solved by inverting Eq. (1) to yield a generic solution  
 589 in terms of the pressure at an arbitrary point, in this case chosen as  $P_{i,0}$ :

$$P_{i,0} = P_{i,0}$$

$$P_{i+1,0} = P_{i,0} - \frac{1}{2} \frac{R_A^{-1} - R_T^{-1}}{R_A^{-1} + R_B^{-1} + R_T^{-1}} \Delta P$$

$$P_{i,1} = P_{i,0} - \frac{1}{2} \frac{R_B^{-1} + R_T^{-1}}{R_A^{-1} + R_B^{-1} + R_T^{-1}} \Delta P$$

$$P_{i+1,1} = P_{i,0} - \frac{1}{2} \Delta P$$

590 We can then determine the ratio of flow along the two lateral paths,  $Q_B$ , relative to the  
 591 flow through the apartment,  $Q_A$ , which are given by:

$$\frac{Q_A}{Q_B} = \frac{R_B + R_A}{R_T - R_A}$$

592           Since this ratio changes sign as a function of the relative magnitude of  $R_A$  and  $R_T$ , this  
593 result indicates that there are two regimes of fluid flow. When  $R_T > R_A$ , which is the typical  
594 scenario for previously studied trapping designs, the flow ratio is positive and approaches a  
595 singularity when  $R_T$  is nearly equal to  $R_A$ . This singularity defines a critical point where there is  
596 zero flow through the lateral branches,  $R_B$ , and all of the flow moves solely through the  $R_A$  and  
597  $R_T$  paths, practically in straight lines. An alternative way to think of this phenomenon is that the  
598 pressure at the adjacent nodes  $P_{i,0}$  and  $P_{i,1}$  are equal when  $R_A$  and  $R_T$  have equal resistance,  
599 leading to zero flow in the lateral branches.

600           The other flow regime, which has not previously been reported, occurs when  $R_T < R_A$ ,  
601 which leads to the ratio in Eq. (3) becoming negative. The significance of this sign inversion is  
602 that the flow through the lateral branches,  $Q_B$ , is assigned in the wrong direction. In this flow  
603 regime, all of the fluid joins together at the branch point and flows through the trap, which is a  
604 perfect trap from a mathematical sense.

## 605 Supplementary Figures

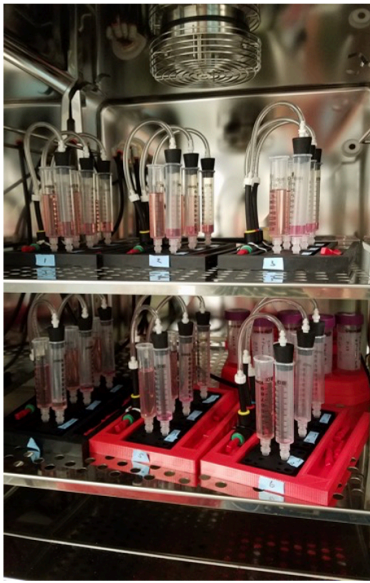

606 (a)

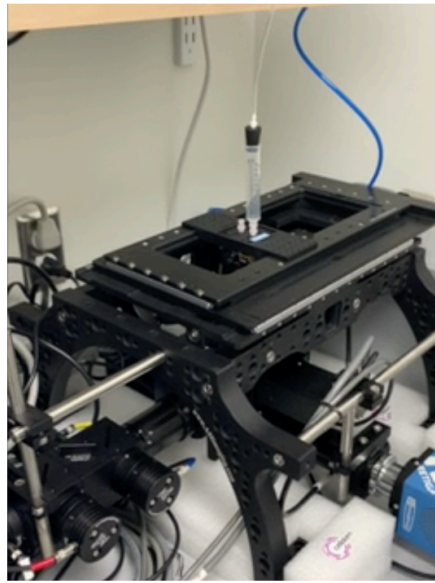

606 (b)

607 **Figure S1.** The incubator system used for maintaining chips with media is shown (a).

608 Continuous media flow through the chips was achieved by pulling vacuum at the outlet, while

609 allowing the media at the inlet to be exposed to the gas- and temperature-controlled

610 environment of the incubator. External to the environment, the pressure was maintained by 6

611 vacuum regulators, which were divided with 3-way splitter manifolds, enabling up to 18 chips to

612 be contained simultaneously. The chip on the imager is shown (b).

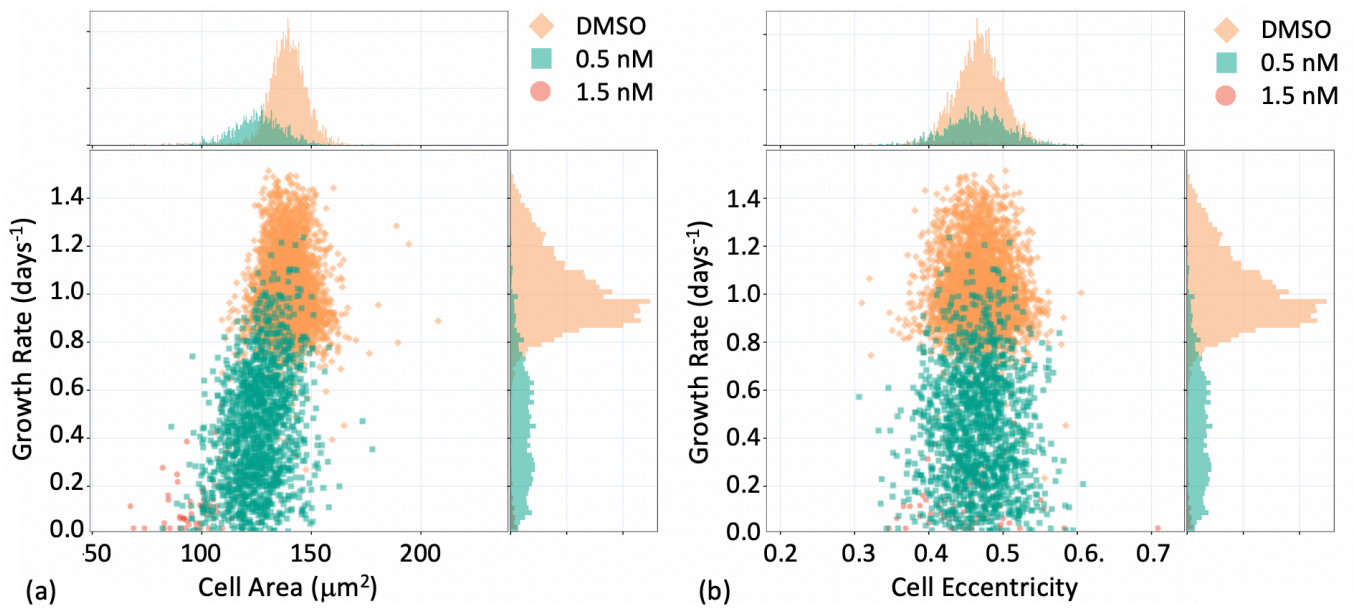

613

614 **Figure S2.** Size and shape dependence on clonal growth rates is shown for an example chip in

615 the 1.5 nM, 0.5 nM and DMSO cohort. There is positive correlation between cell size and

616 growth rate, however a correlation between cell shape and growth rate was not observed.

617

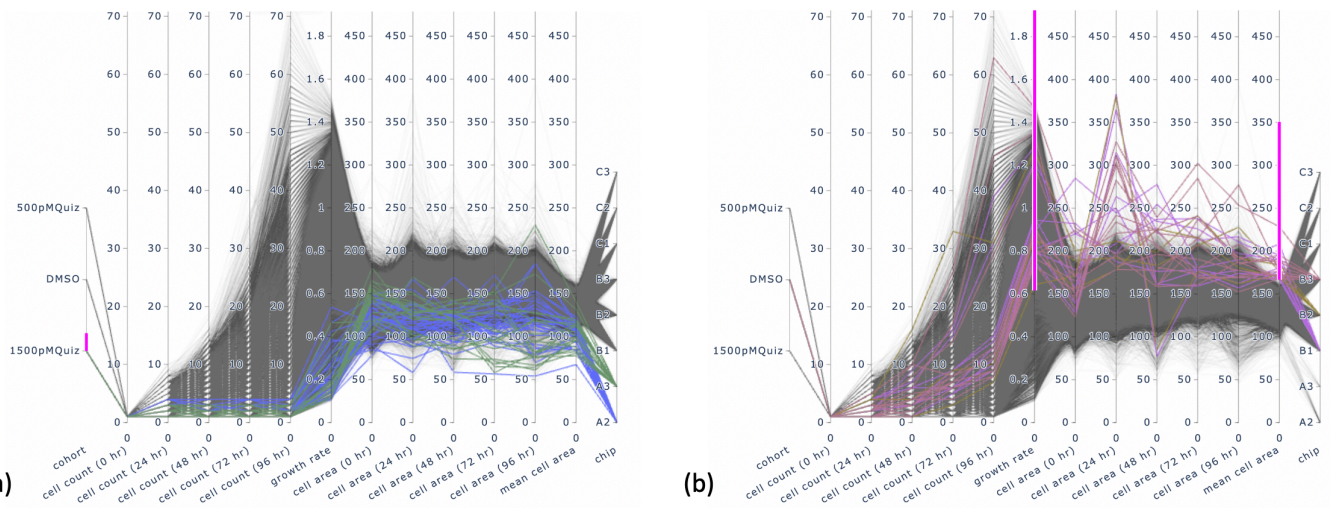

618

619

620

621

622

623

624

625

626

627

**Figure S3.** The parallel coordinates plot shows the growth and size trajectory for each cell identified in the different cohorts and chips and is used as compact method for visualizing linked phenotypic attributes. The pink bars represent the filtering to highlight the linked attributes. (a) The growth trajectories of the 1.5 nM quizartinib cohort, which are highlighted in the blue and green trajectories, show significantly lower growth rates and smaller time-averaged cell size. (b) A subset of cells are filtered to display the cell trajectories with growth rates greater than 0.66 doublings per day and with cell areas greater than 150  $\mu\text{m}^2$ .

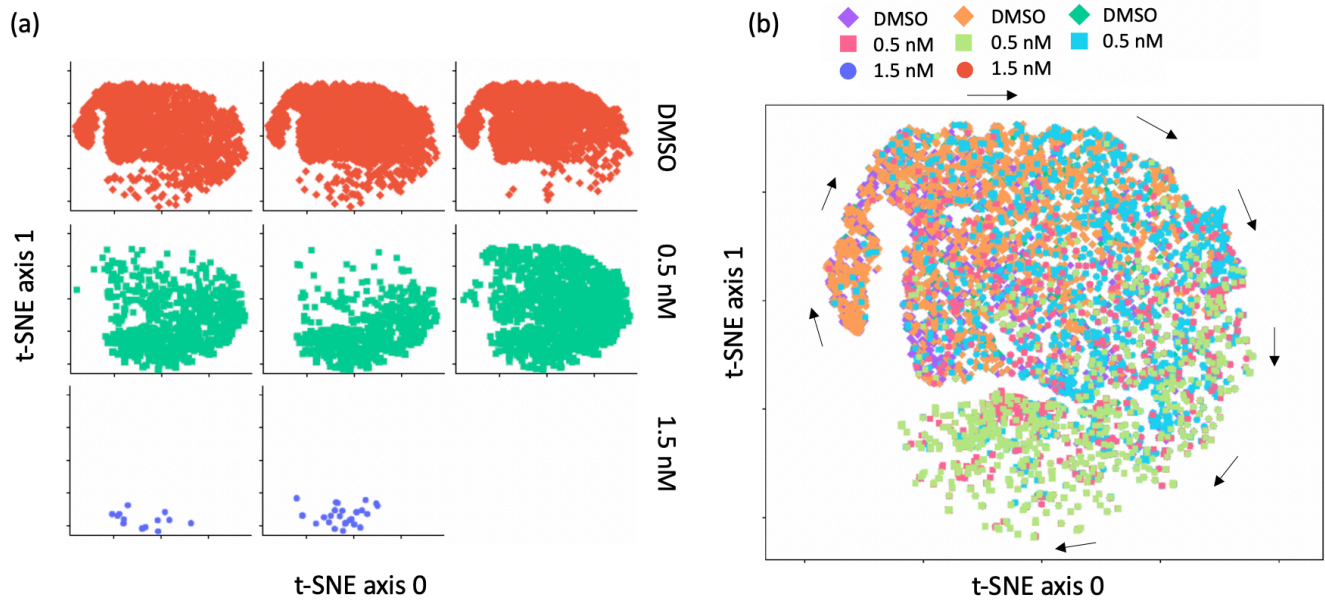

628

629 **Figure S4.** t-SNE plot is shown for the cell trajectory data. The arrows denote the direction of  
630 decreasing cell doubling rate. The individual cluster map for each chip is shown in (a) and the  
631 combined data overlaid is shown in (b).



632 **Supplementary Movies**

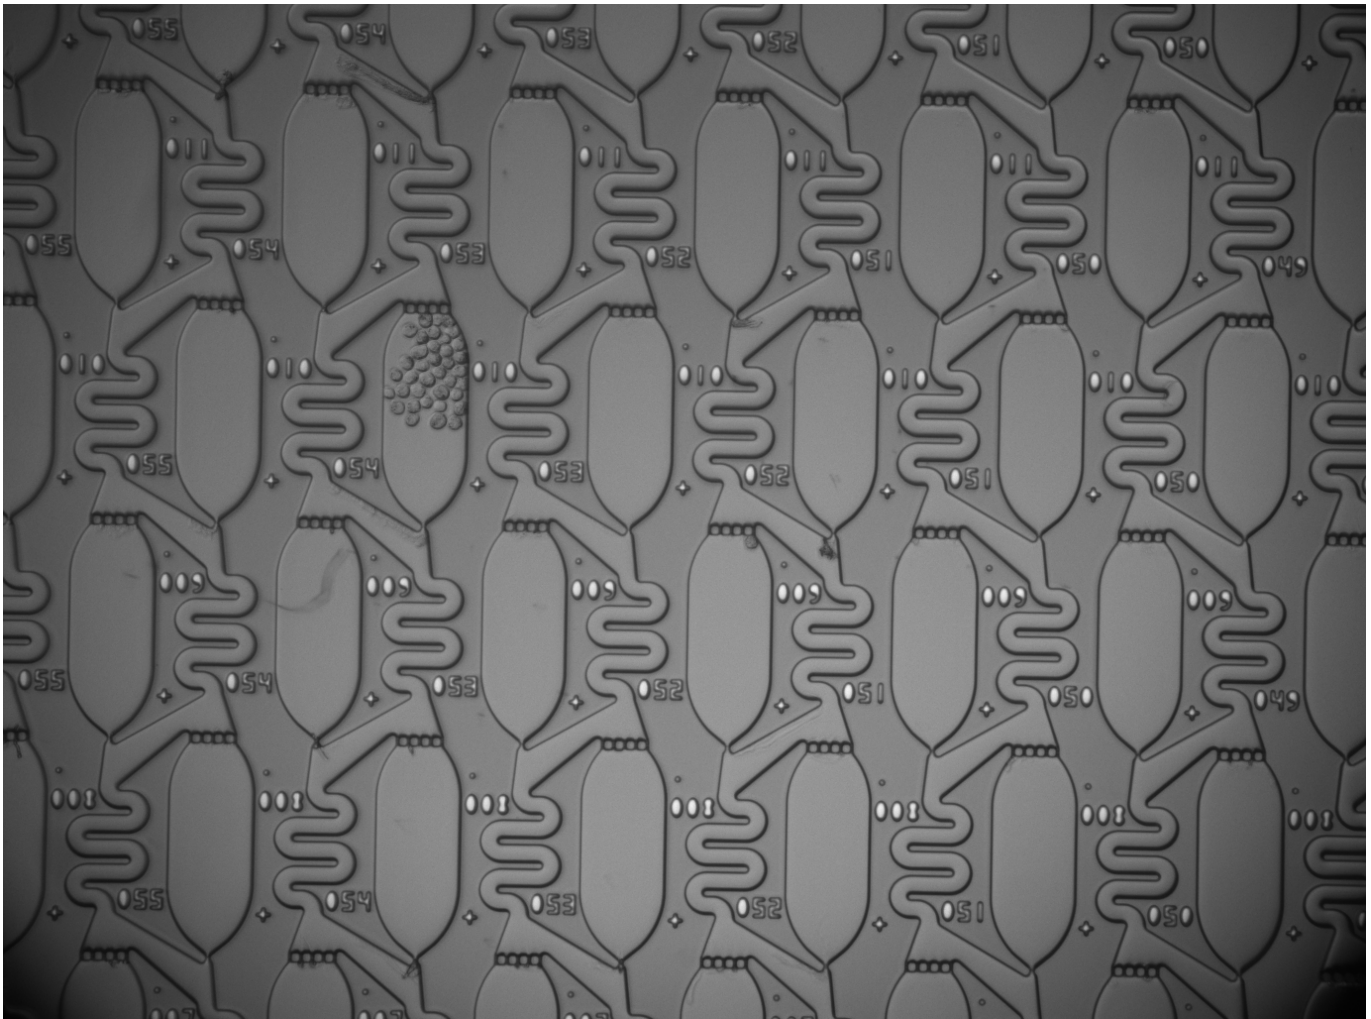

633

634 **Movie S1.** This time-lapse video shows a single drug-resistant MOLM-13 clone emerging after  
635 120 hr of continuous exposure to 0.75 nM quizartinib.

636
